# Supplementary material
Source: PubMed Central journal article supplement (PMC4771330)
Supplement: AEM.02950-15_zam999116974so1.pdf [file AEM.02950-15_zam999116974so1.pdf]

## Supplemental Legends

**FIG S1** Nucleotide sequence alignment of the *iglA-D* containing region of *F.n.n.* FSC769 and other selected *Francisella* sp.: *F.n.o.* LADL--07-285A (GI: 564747871), *F. philomiragia* ATCC 25017 (GI: 167596226), *F. novicida* U112 (GI: 754269614), *F. holarctica* LVS (GI: 754265763) and *F.t.t.* Schu S4 (GI: 754282044). Pink background indicates nucleotide differences and dots represent identical residues between strains. Genes are labeled with yellow arrows behind the nucleotide sequence pointing in the coding direction and the gene order is *iglA*, *iglB*, *iglC* and *iglD*. *F.n.o.* has a premature stop codon 21 bp before the end of *iglA* compared to the other *Francisella* sp. analyzed.

**FIG S2** Representative dotplots of *Dictyostelium* wt cells infected with *F.n.n.* wt and  $\Delta$ *iglC* (upper and middle panel) and *Dictyostelium*  $\Delta$ *atg1* cells infected with *F.n.n.* wt (lower panel) at 1, 4, 24 and 48 hpi. Displayed is the sideward scatter (SSC) plotted as a function of green fluorescence (FL-1). After enhancement of the endogenous *F.n.n.* GFP signal with an AlexaFluor488-coupled antibody we observe two separate populations of weakly (non-infected) and strongly fluorescent (infected) cells.

**FIG S3** Replication of *F.n.n.* in zebrafish is dependent on *IglC*

(A) Site of microinjection (white circle) and observation area of bacterial growth using fluorescence microscopy (black rectangle). (B-G) Representative micrographs show the fluorescent signal of *F.n.n.* wt (B, C), *F.n.n.*  $\Delta$ *iglC* (D, E) and PBS as a negative control (F, G) at 6 dpi. Displayed are the green channel (GFP) and an overlay with the corresponding bright field image of the zebrafish tail region. (H) Bacterial

replication of *F.n.n.* wt (black), *F.n.n. ΔiglC* (white) and *F.n.n. iglC+* (grey) measured by qPCR at 3 and 7 dpi (n=3). In the *F.n.n. ΔiglC* infected group (6 dpi), a few of the embryos displayed a substantial amount of green fluorescent granulas in parts of the yolk sac. This could suggest that the *F.n.n. ΔiglC* mutant succeeds in some individuals, however selected individual responses of zebrafish embryos to bacterial infections were observed before (91). This different degree of success is reflected in the gDNA samples, where one *ΔiglC* sample (consisting of 3 embryos each) contained a much higher quantity of *F.n.n.* genomes than the others 7 dpi.

**FIG S4** Additional ultrastructural analysis of intracellular *F.n.n.* wt samples processed by chemical fixation and room temperature dehydration (A, B) or HPF and freeze substitution (C, D). (A, B) Ultrastructural analysis of phagosomal (A) and cytosolic (B) *F.n.n.* after chemical fixation at 2 and 4 hpi, respectively. Cytosolic as well as phagosomal bacteria are surrounded with the electron-translucent area, which indicates fixation artefacts. (C, D) Overview (C) and high magnification (D) showing formerly cytosolic *F.n.n.* wt at 1 hpi possibly contained within an autophagosome as indicated by the limiting autophagic-like membrane and the ribosomes in the lumen. Bacteria are surrounded with an electron pale area indicating the presence of weakly contrasted material, which was a characteristic appearance of cytosolic bacteria after HPF and freeze substitution. No binding of various lectins (wheat germ agglutinin, concanavalin A, ricinus agglutinin I, *Erythrina cristagalli* lectin, *Maackia amurensis* Lectin I or *Maclura pomifera* lectin) was observed indicating no enrichment in mannose, glucose, N-acetylglucosamine, galactose, N-acetylgalactoseamine or sialic acid components. Asterisks: *F.n.n.*, arrows: *F.n.n.*-enclosing membrane, white arrowheads: electron-translucent area characteristic of chemically fixed bacteria,

black arrowheads: electron-pale area characteristic for HPF. Scale bars: 500 nm (A, B, D), 2  $\mu$ m (C).

**Fig S5** Visualization of the rupture of the phagosomal membrane by electron and fluorescence microscopy. (A, B) Electron microscopy following HPF and freeze substitution reveals rupturing phagosomal membrane in *Dictyostelium* cells infected with *F.n.n.* wt at 1 hpi. Asterisks: *F.n.n.*, arrowheads: broken membrane. (C, D) Confocal fluorescence microscopy shows the broken p80-positive compartment (green) and escaping *F.n.n.* wt (red) at 4 hpi. The inset displays the green channel (p80) of the region of interest (white square). Scale bars: 500nm (A, B), 5  $\mu$ m (C, D).

**FIG S6** Phagosomal maturation and ubiquitination in *Dictyostelium*  $\Delta$ *atg1* cells (A-C) Association rates of *F.n.n.* wt with p80 (A), VatA (B) and ubiquitin (C) in *Dictyostelium*  $\Delta$ *atg1* cells over 48 hpi. Data of 3 independent experiments (mean $\pm$ SEM) was collected for each association study and a minimum of 100 bacteria was counted at each timepoint. (D) Representative micrographs of accumulated, ubiquitinated (green) *F.n.n.* wt (red) in *Dictyostelium*  $\Delta$ *atg1* cells at 48 hpi. The margin of the cell is marked with a dashed line and the inset shows only ubiquitin in the green channel. Scale bar: 5  $\mu$ m.

**Movie S1** Live cell microscopy of *Dictyostelium* Lifeact-RFP (red) infected with *F.n.n.* wt expressing GFP (green) at 19 hpi. The inset displays the red channel (actin) of the region of interest (white square). Scale bar: 5  $\mu$ m.

**Movie S2** Live cell microscopy of *Dictyostelium* Lifeact-RFP (red) infected with *F.n.n.*  $\Delta ig1C$  expressing GFP (green) at 2 hpi. The inset displays the red channel (actin) of the region of interest (white square). Scale bar: 5  $\mu$ m.

## **Cryofixation, chemical fixation and Transmission Electron Microscopy**

Cellulose capillary tubes (a kind gift by Heinz Schwarz) with an inner diameter of 200 µm were filled with a concentrated suspension of infected cells by capillary action (Hohenberg *et al.*, 1994), cut into short segments and transferred into aluminium planchettes (with a 6 mm diameter and a 150 µm recess), filled with 1-hexadecene (Merck Millipore, Darmstadt, Germany). Samples were cryofixed in an EM HPM100 high-pressure freezing machine (Leica Microsystems, Vienna, Austria) (Kaech *et al.*, 2014). Freeze substitution (Balzers FSU 010; Bal-Tec, Balzers, Liechtenstein) was performed as described (Leonidova *et al.*, 2014) in acetone containing 1% osmium tetroxide for 8 h at -90°C, 6 h at -60°C and 4 h at -40°C. Afterwards samples were incubated for 1 h on ice, washed with acetone and incubated with 1% uranyl acetate in acetone for 1 h on ice. After washing samples were then progressively infiltrated with epon resin (Fluka, St. Louis, Missouri, USA) (15, 33, 50, 80, 100%) over two days at room temperature or they were first incubated with 0.5% glutaraldehyde (GA) for 30 min at 4°C, washed and then infiltrated with LR White resin (Electron Microscopic Sciences, Hatfield, PA, USA) (50, 100%) over 10 hours. Eventually samples were polymerized overnight at 70°C. Around 70 nm sections were cut using an ultra 45° diamond knife (Diatome, Biel, Switzerland). Sections were examined without additional contrasting using a CM100 transmission electron microscope (Philips, Eindhoven, Netherlands). The images were recorded digitally with a Quemesa TEM CCD camera and iTEM software v 5.1 (both Olympus Soft Imaging Solutions, Münster, Germany).

The embedding of chemically fixed samples was performed by the EM facility at the department of Biosciences, University of Oslo. Infected, attached cells were fixed in a solution of 2% GA and 1% PFA in HL5c for 2 h at RT and washed with sterile PBS. Subsequently, 2% GA/sodium cacodylate (0.1 M) was added before the fixed cells

were scraped off the well bottom with a cell scraper and stored at 4°C. The cell pellets were subsequently washed 2 x 10 min with 0.1 M sodium cacodylate buffer, then incubated for 1 h in darkness with the aqueous solution of 2% OsO<sub>4</sub> and 1.5% K<sub>3</sub>Fe(CN)<sub>6</sub>, washed 2 x 10 min in dH<sub>2</sub>O and stained with 1.5% uranylacetate for 30 min. Samples were dehydrated in 70, 80, 90, 96% EtOH for 10 min in each concentration before 4 x 15 min in absolute EtOH. The pellets were resuspended in 1:1 epon/propylene oxide and rotated O/N with open lids before Epon polymerization at 60°C for 3 days. Sections were prepared and examined as described above for cryofixed samples.

- Hohenberg, H., Mannweiler, K. and Muller, M. (1994). High-pressure freezing of cell suspensions in cellulose capillary tubes. *Journal of microscopy* **175**, 34-43.
- Kaech, A. and Ziegler, U. (2014). High-pressure freezing: current state and future prospects. *Methods in molecular biology* **1117**, 151-171.
- Leonidova, A., Pierroz, V., Rubbiani, R., Lan, Y.J., Schmitz, A.G., Kaech, A., *et al.* (2014). Photo-induced uncaging of a specific Re(I) organometallic complex in living cells. *Chem Sci* **5**, 4044-4056.

F.n.n. FSC769 **ATGGCGAAAAATAAGATTCCAAATTC AAGGTTGATGATAAATTATGAAACTAAAGTGGAT** 60  
 F.n.o. LADL-07-285A ..... **A** ..... **A** ..... **T** ..... 60  
 F. philomiragia ATCC 25017 ..... **A** ..... **C** ..... **G** ..... 60  
 F. novicida U112 ..... **A** ..... **A** **C** ..... **T** **T** ..... 60  
 F.t. holarctica LVS ..... **A** ..... **A** **C** ..... **T** **T** ..... 60  
 F.t.t. Schu S4 ..... **A** ..... **A** **C** ..... **T** **T** ..... 60  
 Consensus **ATGGCAAAAAATAANATNCCAAATTC AAGGTTGATGATAAATTATGAAACTAATGTNGAT**

F.n.n. FSC769 **GGGGTTCTAAAGAAAAAGAATTGCCTTACAGAGTTTTAGTTGTTGGTGATTTGTGCGAAA** 120  
 F.n.o. LADL-07-285A ..... **A** ..... **A** ..... **C** ..... **A** ..... 120  
 F. philomiragia ATCC 25017 ..... **A** ..... **A** ..... **G** **A** ..... **A** **A** **G** ..... 120  
 F. novicida U112 ..... **T** **CT** ..... **GC** **A** ..... **CC** ..... **C** ..... **A** **A** ..... 120  
 F.t. holarctica LVS ..... **T** **CT** ..... **GC** **A** ..... **CC** ..... **C** ..... **A** **A** ..... 120  
 F.t.t. Schu S4 ..... **T** **CT** ..... **GC** **A** ..... **CC** ..... **C** ..... **A** **A** ..... 120  
 Consensus **GGTGTNNNTAAAGAAAAAGANNACCTTACAGAGTNNNTAGTTGTTGGNGATTTNTCAAAA**

F.n.n. FSC769 **GGAAGATCCGTAGATGCTAAAAAAGAGTTTATTGATAGAGCTGTAGACGAGTAAATAAT** 180  
 F.n.o. LADL-07-285A ..... **G** ..... **C** ..... 180  
 F. philomiragia ATCC 25017 ..... **G** ..... **C** ..... **G** ..... 180  
 F. novicida U112 ..... **T** **G** ..... **A** ..... **CGCA** ..... **AG** **C** ..... **A** ..... 180  
 F.t. holarctica LVS ..... **T** **G** ..... **A** ..... **CGCAT** ..... **AG** **C** ..... **A** ..... 180  
 F.t.t. Schu S4 ..... **T** **G** ..... **A** ..... **CGCA** ..... **AG** **C** ..... **A** ..... 180  
 Consensus **GGAAGATCTGTNGATGCAAAAAAAGAGTTNNCNGATAGAGNGGTNAGANGAGTAAATAAT**

F.n.n. FSC769 **GGTGTGATAGAGCCTTAGAAGATATGAATATATCTTTTGACTTTGAAGTCCGAACTTT** 240  
 F.n.o. LADL-07-285A ..... **G** ..... **T** ..... **A** **A** **T** **C** ..... 240  
 F. philomiragia ATCC 25017 ..... **G** ..... **T** ..... **A** ..... 240  
 F. novicida U112 ..... **G** **TT** ..... **G** ..... **T** ..... **G** **A** **A** ..... 240  
 F.t. holarctica LVS ..... **G** **TT** ..... **G** ..... **T** ..... **G** **A** **A** ..... 240  
 F.t.t. Schu S4 ..... **G** **TT** ..... **G** ..... **T** ..... **G** **A** **A** ..... 240  
 Consensus **GGTGTGATAGNGNNTTAGAAGANATGAATATATCTTTTGATTTTGANGCACCAAACTTT**

F.n.n. FSC769 **GTTTCAAAGGATCCTAGTAATCTAAAAGTTAATTATAGAATCCAAAGTGTAAAAGATTTT** 300  
 F.n.o. LADL-07-285A ..... **C** **T** **A** **C** ..... **G** **C** ..... **T** ..... 300  
 F. philomiragia ATCC 25017 ..... **A** ..... **T** ..... 300  
 F. novicida U112 ..... **T** **A** ..... **T** ..... **TG** ..... **C** ..... 300  
 F.t. holarctica LVS ..... **T** **A** ..... **T** ..... **TG** ..... **C** ..... 300  
 F.t.t. Schu S4 ..... **T** **A** ..... **G** ..... **T** ..... **TG** ..... **C** ..... 300  
 Consensus **GTTTCAAAGATCCTAGTAATTTAAAAGTTAATTATAGAATNAAAGTGTNAAAGATTTT**

F.n.n. FSC769 **AAACCTGATGCTGTTGCTAAAAAAGTTCCAGAAATCGGAGCACTACTCGAAATGAAAGAG** 360  
 F.n.o. LADL-07-285A ..... **GG** ..... **G** ..... **T** **G** **TA** ..... **CT** **G** **T** ..... **A** ..... 360  
 F. philomiragia ATCC 25017 ..... **G** ..... **A** ..... 360  
 F. novicida U112 ..... **G** ..... **T** ..... **A** ..... **G** **G** **T** ..... 360  
 F.t. holarctica LVS ..... **G** ..... **T** ..... **A** ..... **G** **G** **T** ..... 360  
 F.t.t. Schu S4 ..... **G** ..... **T** ..... **A** ..... **G** **G** **T** ..... 360  
 Consensus **AGACCTGATGCTGTTGCTAAAAAAGTTCCAGAAATCAGAGCGCTGCTTGAATGAAAGAG**

F.n.n. FSC769 **ATATTAGCATCTTTTGCTAAGAATATTGAAAATAATCGCAATCTTAAAAGACTATAGAT** 420  
 F.n.o. LADL-07-285A ..... **G** ..... **T** ..... **C** ..... **C** ..... 420  
 F. philomiragia ATCC 25017 ..... **G** ..... 420  
 F. novicida U112 ..... **G** ..... **G** **C** ..... **T** ..... **C** **G** **A** **C** ..... 420  
 F.t. holarctica LVS ..... **C** ..... **G** **C** ..... **T** ..... **C** **G** **A** **C** ..... 420  
 F.t.t. Schu S4 ..... **C** ..... **G** **C** ..... **T** ..... **C** **G** **A** **C** ..... 420  
 Consensus **ATATTAGCATCTTTTGCTAAGGANATTGAAAATAATCGTAATCTNAANAANACNATAGAT**

F.n.n. FSC769 **ATGATTTTTTCAGATAATAATGAGCTAGAAGCTTTAAAGAGTAAGATTCCTACTTTAACA** 480  
 F.n.o. LADL-07-285A ..... **G** ..... 480  
 F. philomiragia ATCC 25017 ..... **G** ..... 480  
 F. novicida U112 ..... **G** **C** **AT** ..... **T** **A** ..... **G** **G** ..... 480  
 F.t. holarctica LVS ..... **G** **C** **AT** ..... **T** **A** ..... **G** **G** ..... 480  
 F.t.t. Schu S4 ..... **G** **C** **AT** ..... **T** **A** ..... **G** **G** ..... 480  
 Consensus **ATGATTTTTTCAGATANTAANGANNTAGAANCNTTAAAGAGTAAGATTCCTGCTTTNACA**

F.n.n. FSC769 **AACTATACGATTAAGAAT TCTGATGATGCAGAAGCTGTAGAATCTCAAGAGTCAAGCAAT** 540  
 F.n.o. LADL-07-285A ..... **A** ..... **T** **C** ..... **G** **G** ..... **A** **T** ..... 540  
 F. philomiragia ATCC 25017 ..... **A** ..... **T** **C** ..... **G** **G** ..... **A** **T** ..... 540  
 F. novicida U112 ..... **C** **TG** ..... **CT** **G** ..... **C** **T** **T** ..... 534  
 F.t. holarctica LVS ..... **C** **TG** ..... **CT** **GG** ..... **C** **T** **T** ..... 534  
 F.t.t. Schu S4 ..... **C** **TG** ..... **CT** **G** ..... **C** **T** **T** ..... 534  
 Consensus **AACTATACGATTAAGAANTCTNNTGATGCAGAAG-TGCNGAGTCTCAAGANTNAAGTAAT**

F.n.n. FSC769 **CAAAGACAATAGAGGATAAATAG-GAGAAATTTTGAATGACAGAAAATAGTTTAAGTCT** 599  
 F.n.o. LADL-07-285A **T** ..... **A** **G** ..... **G** ..... **TT** **AT** ..... 599  
 F. philomiragia ATCC 25017 ..... **A** **G** ..... **G** ..... **TT** **AT** ..... 599  
 F. novicida U112 ..... **C** **G** ..... **T** **G** ..... **A** ..... **GTT** ..... **AT** ..... **AA** ..... 591  
 F.t. holarctica LVS ..... **C** **G** ..... **T** **G** ..... **G** ..... **TT** ..... **AT** ..... **AA** ..... 591  
 F.t.t. Schu S4 ..... **C** **G** ..... **T** **G** ..... **G** ..... **TT** ..... **AT** ..... **AA** ..... 591  
 Consensus **CAANAGACANTAGATGNTAANTAG-GAGGATTTTANNAATGACANNAATANNTTAAGTCT**

F.n.n. FSC769 **TACAGATGAACCTTTAAACAATTTTGGTGGTTCAGCTGAGATTGATAGCGTACTTAAAAA** 659  
 F.n.o. LADL-07-285A ..... **T** ..... **C** ..... **G** ..... 659  
 F. philomiragia ATCC 25017 ..... **T** ..... **C** ..... **G** ..... 659  
 F. novicida U112 ..... **C** **T** ..... **T** ..... **G** **A** **TA** **A** **AG** ..... **T** ..... **C** ..... 651  
 F.t. holarctica LVS ..... **C** **T** ..... **T** ..... **G** **A** **TA** **A** **AG** ..... **T** ..... **C** ..... 651  
 F.t.t. Schu S4 ..... **C** **T** ..... **T** ..... **G** **A** **TA** **A** **AG** ..... **T** ..... **C** ..... 651  
 Consensus **NACNGATGAACCTTTAAATAATTTTGGNGGNTCNCNGANGTTGATAGNGTACTNAAAAA**

F.n.n. FSC769 **TATAGATTTTGATGTTTCAGGTGATGCATCTAAAGTCTTCTTTATCTTCAGATTATAA** 719  
 F.n.o. LADL-07-285A ..... **G** **C** ..... 719  
 F. philomiragia ATCC 25017 ..... 719  
 F. novicida U112 ..... **A** ..... **T** ..... **T** **A** ..... **A** **T** **C** **C** ..... 711  
 F.t. holarctica LVS ..... **A** ..... **T** ..... **T** **A** ..... **A** **T** **C** **C** ..... 711  
 F.t.t. Schu S4 ..... **A** ..... **T** ..... **T** **A** ..... **A** **T** **C** **C** ..... 711  
 Consensus **TATAGATTTTGATGTTTCAGNTGATGCNTCTAAAGTTNTNTCTTTATCTNCGANTANAA**

F.n.n. FSC769 **TGCTAGAAACCTTATGGCATTATCTCTTGTGTTAGCAAATAATGAAAGTATAAATAATTA** 779  
 F.n.o. LADL-07-285A ..... 779  
 F. philomiragia ATCC 25017 ..... **C** ..... 779  
 F. novicida U112 ..... **GC** ..... **T** **G** **A** ..... **T** **A** ..... 771  
 F.t. holarctica LVS ..... **GC** ..... **T** **G** **A** ..... **T** **A** ..... 771  
 F.t.t. Schu S4 ..... **GC** ..... **T** **G** **A** ..... **T** **A** ..... 771  
 Consensus **TGCTAGAAACCTTATGGCNTATCTNNTAGCAAATAATGANANTATAAATAATTA**

F.n.n. FSC769 **TAACCAAAAGTATATCCAGAAAGTTATTACGGTAATTGATAGACTCATTGATTTACAAGT** 839  
 F.n.o. LADL-07-285A ..... **T** ..... **A** **T** ..... 839  
 F. philomiragia ATCC 25017 ..... **T** ..... **T** ..... 839  
 F. novicida U112 ..... **C** **T** ..... **A** ..... **T** **A** ..... **A** **T** ..... **AG** **G** ..... 831  
 F.t. holarctica LVS ..... **T** ..... **A** ..... **A** **T** ..... **G** **T** ..... 831  
 F.t.t. Schu S4 ..... **T** ..... **A** ..... **A** **T** ..... **AG** **T** ..... 831  
 Consensus **TAANCAAAANTATATCCAGAAAGTTATTACAGTATTGATANNCTTATTGATTTACAAGT**

F.n.n. FSC769 **TAATGCTATTATATCAAATGATGAGTTTAGATCTCTTGAGCAAGAGTGGTTGAAGGTACA** 899  
 F.n.o. LADL-07-285A ..... **C** ..... **A** ..... **A** ..... **A** ..... **A** ..... **A** ..... 899  
 F. philomiragia ATCC 25017 ..... **C** ..... **T** **A** **T** ..... 899  
 F. novicida U112 ..... **CT** ..... **T** ..... **G** **A** ..... **A** ..... **C** **A** ..... **G** ..... 891  
 F.t. holarctica LVS ..... **T** ..... **T** ..... **G** **A** ..... **A** ..... **C** **A** ..... **G** ..... 891  
 F.t.t. Schu S4 ..... **T** ..... **T** ..... **G** **A** ..... **A** ..... **C** **A** ..... **G** ..... 891  
 Consensus **TAATNCTATTATATCNAATGATGAGTTTAGANCNCTTGAGCAAGAATGGCTAAAGGTGCA**

F.n.n. FSC769 **AGAGGTTTGTCAAGATGATTTGTGATAATGTAGAAGTAAGTATATTAGACGTTAAGAAAGA** 959  
 F.n.o. LADL-07-285A ..... **A** ..... 959  
 F. philomiragia ATCC 25017 ..... **G** **A** ..... **C** **AC** ..... **T** **C** ..... 959  
 F. novicida U112 ..... **A** **C** **A** ..... **T** ..... **T** **A** **A** ..... 951  
 F.t. holarctica LVS ..... **A** **C** **A** ..... **T** ..... **T** **A** **A** ..... 951  
 F.t.t. Schu S4 ..... **A** **C** **A** ..... **T** ..... **T** **A** **A** ..... 951  
 Consensus **AGAGGTTTGTCAAGANGACTATGATAATGTNGAAGTAAGTATATTAGATGTAANAAAGA**



|                            |                                                                                                                                                                                                                             |      |
|----------------------------|-----------------------------------------------------------------------------------------------------------------------------------------------------------------------------------------------------------------------------|------|
| F.n.n. FSC769              | <b>AGAATTACAGTATGACTTTGAGAGAAATCTATATGACATATCTAGTAGCGATTTCCTTTAA</b>                                                                                                                                                        | 1019 |
| F.n.o. LADL-07-285A        | . . . . . <b>G</b> . . . . .                                                                                                                                                                                                | 1019 |
| F. philomiragia ATCC 25017 | . . . . . <b>T</b> . . . . . <b>C</b> . . . . .                                                                                                                                                                             | 1019 |
| F. novicida U112           | . . . . . <b>GC</b> . . . . . <b>A</b> . . . . . <b>T</b> . . . . . <b>C</b> . . . . . <b>T</b> . . . . . <b>C</b> . . . . .                                                                                                | 1011 |
| F.t. holarctica LVS        | . . . . . <b>GC</b> . . . . . <b>A</b> . . . . . <b>T</b> . . . . . <b>C</b> . . . . . <b>T</b> . . . . . <b>T</b> . . . . . <b>T</b> . . . . . <b>C</b> . . . . . <b>T</b> . . . . . <b>C</b> . . . . .                    | 1011 |
| F.t.t. Schu S4             | . . . . . <b>GC</b> . . . . . <b>A</b> . . . . . <b>T</b> . . . . . <b>C</b> . . . . . <b>T</b> . . . . . <b>C</b> . . . . . <b>T</b> . . . . . <b>C</b> . . . . . | 1011 |
| Consensus                  | <b>AGAGNTACANTATGATTTNGAGAGAAATNTATATGANATATCTAGTAGNGACTTNTTAA</b>                                                                                                                                                          |      |
| F.n.n. FSC769              | <b>GAAAGTGATGTTGCAGAATTTGATCAATATGGTGGTGAACCATATGGCGCAATACCTCGG</b>                                                                                                                                                         | 1079 |
| F.n.o. LADL-07-285A        | . . . . . <b>A</b> . . . . . <b>CT</b> . . . . . <b>T</b> . . . . . <b>A</b> . . . . .                                                                                                                                      | 1079 |
| F. philomiragia ATCC 25017 | . . . . . <b>T</b> . . . . . <b>T</b> . . . . . <b>G</b> . . . . .                                                                                                                                                          | 1079 |
| F. novicida U112           | . . . . . <b>A</b> . . . . . <b>A</b> . . . . . <b>T</b> . . . . . <b>C</b> . . . . . <b>T</b> . . . . . <b>T</b> . . . . . <b>A</b> . . . . .                                                                              | 1071 |
| F.t. holarctica LVS        | . . . . . <b>A</b> . . . . . <b>T</b> . . . . . <b>C</b> . . . . . <b>T</b> . . . . . <b>A</b> . . . . . <b>T</b> . . . . . <b>T</b> . . . . . <b>A</b> . . . . .                                                           | 1071 |
| F.t.t. Schu S4             | . . . . . <b>A</b> . . . . . <b>T</b> . . . . . <b>C</b> . . . . . <b>T</b> . . . . . <b>C</b> . . . . . <b>T</b> . . . . . <b>T</b> . . . . . <b>A</b> . . . . .                                                           | 1071 |
| Consensus                  | <b>NAAAGTNTATGTTTCAGAATTTGATCAATATGGTGGTGAACCNATGGCGCAATANTAGG</b>                                                                                                                                                          |      |
| F.n.n. FSC769              | <b>CTTGATAATTTTGAAAACACTACAAATGATATAAATTTGGTTGACAGGGATGGGCATGGT</b>                                                                                                                                                         | 1139 |
| F.n.o. LADL-07-285A        | <b>AC</b> . . . . . <b>G</b> . . . . . <b>G</b> . . . . . <b>A</b> . . . . . <b>C</b> . . . . .                                                                                                                             | 1139 |
| F. philomiragia ATCC 25017 | . . . . . <b>T</b> . . . . . <b>T</b> . . . . . <b>T</b> . . . . .                                                                                                                                                          | 1139 |
| F. novicida U112           | . . . . . <b>A</b> . . . . . <b>T</b> . . . . . <b>C</b> . . . . . <b>T</b> . . . . . <b>A</b> . . . . . <b>T</b> . . . . .                                                                                                 | 1131 |
| F.t. holarctica LVS        | . . . . . <b>A</b> . . . . . <b>T</b> . . . . . <b>C</b> . . . . . <b>T</b> . . . . . <b>T</b> . . . . . <b>A</b> . . . . . <b>T</b> . . . . .                                                                              | 1131 |
| F.t.t. Schu S4             | . . . . . <b>A</b> . . . . . <b>T</b> . . . . . <b>C</b> . . . . . <b>T</b> . . . . . <b>T</b> . . . . . <b>A</b> . . . . . <b>T</b> . . . . .                                                                              | 1131 |
| Consensus                  | <b>ATTGTATAATTTTGAAAANACNACAAATGATATAAATTTGGTTGACTGGNATGGGNATGGT</b>                                                                                                                                                        |      |
| F.n.n. FSC769              | <b>GGCAAAGAATTCATGCCCATTTATAGCATCAATAGACAAGTCATTTTGGTGTTAA</b>                                                                                                                                                              | 1199 |
| F.n.o. LADL-07-285A        | . . . . . <b>A</b> . . . . . <b>C</b> . . . . . <b>AT</b> . . . . . <b>T</b> . . . . . <b>T</b> . . . . .                                                                                                                   | 1199 |
| F. philomiragia ATCC 25017 | . . . . . <b>T</b> . . . . . <b>T</b> . . . . . <b>T</b> . . . . .                                                                                                                                                          | 1199 |
| F. novicida U112           | . . . . . <b>A</b> . . . . . <b>T</b> . . . . . <b>T</b> . . . . . <b>T</b> . . . . . <b>C</b> . . . . .                                                                                                                    | 1191 |
| F.t. holarctica LVS        | . . . . . <b>A</b> . . . . . <b>T</b> . . . . . <b>T</b> . . . . . <b>T</b> . . . . . <b>C</b> . . . . .                                                                                                                    | 1191 |
| F.t.t. Schu S4             | . . . . . <b>A</b> . . . . . <b>T</b> . . . . . <b>T</b> . . . . . <b>T</b> . . . . . <b>C</b> . . . . .                                                                                                                    | 1191 |
| Consensus                  | <b>GGCAAAGAATTCATGCACCATTATNGCATCAATTGANAAGTCATNTTTGGTGTTAA</b>                                                                                                                                                             |      |
| F.n.n. FSC769              | <b>AGATCTATCAGAAATAACTCACATAAAGAGTTTGAATCCTTGTAGAACATCCTAGATA</b>                                                                                                                                                           | 1259 |
| F.n.o. LADL-07-285A        | . . . . . <b>T</b> . . . . . <b>T</b> . . . . . <b>T</b> . . . . . <b>C</b> . . . . . <b>G</b> . . . . . <b>T</b> . . . . . <b>A</b> . . . . . <b>C</b> . . . . .                                                           | 1259 |
| F. philomiragia ATCC 25017 | . . . . . <b>T</b> . . . . . <b>T</b> . . . . . <b>T</b> . . . . .                                                                                                                                                          | 1259 |
| F. novicida U112           | . . . . . <b>G</b> . . . . . <b>T</b> . . . . . <b>C</b> . . . . . <b>T</b> . . . . . <b>A</b> . . . . . <b>G</b> . . . . . <b>T</b> . . . . . <b>C</b> . . . . . <b>T</b> . . . . . <b>G</b> . . . . .                     | 1251 |
| F.t. holarctica LVS        | . . . . . <b>G</b> . . . . . <b>T</b> . . . . . <b>C</b> . . . . . <b>T</b> . . . . . <b>A</b> . . . . . <b>G</b> . . . . . <b>T</b> . . . . . <b>C</b> . . . . . <b>T</b> . . . . . <b>G</b> . . . . .                     | 1251 |
| F.t.t. Schu S4             | . . . . . <b>G</b> . . . . . <b>T</b> . . . . . <b>C</b> . . . . . <b>T</b> . . . . . <b>A</b> . . . . . <b>G</b> . . . . . <b>T</b> . . . . . <b>C</b> . . . . . <b>T</b> . . . . . <b>G</b> . . . . .                     | 1251 |
| Consensus                  | <b>NGATTTATCAGAAATNACTCATATAAANAGTTTGAANCCTTGTGNTNGANCATCCTAGATA</b>                                                                                                                                                        |      |
| F.n.n. FSC769              | <b>TAAAGAGTGGAATGACTTTAGAAACCTAGATGTAGCTGCATATATCGGTTTGACTATCGG</b>                                                                                                                                                         | 1319 |
| F.n.o. LADL-07-285A        | . . . . . <b>A</b> . . . . . <b>T</b> . . . . . <b>G</b> . . . . . <b>T</b> . . . . . <b>T</b> . . . . . <b>C</b> . . . . . <b>G</b> . . . . .                                                                              | 1319 |
| F. philomiragia ATCC 25017 | . . . . . <b>T</b> . . . . . <b>G</b> . . . . . <b>T</b> . . . . . <b>T</b> . . . . . <b>C</b> . . . . . <b>G</b> . . . . .                                                                                                 | 1319 |
| F. novicida U112           | . . . . . <b>T</b> . . . . . <b>T</b> . . . . . <b>T</b> . . . . . <b>A</b> . . . . . <b>CG</b> . . . . . <b>A</b> . . . . .                                                                                                | 1311 |
| F.t. holarctica LVS        | . . . . . <b>T</b> . . . . . <b>T</b> . . . . . <b>T</b> . . . . . <b>A</b> . . . . . <b>CG</b> . . . . . <b>A</b> . . . . .                                                                                                | 1311 |
| F.t.t. Schu S4             | . . . . . <b>T</b> . . . . . <b>T</b> . . . . . <b>T</b> . . . . . <b>A</b> . . . . . <b>CG</b> . . . . . <b>A</b> . . . . .                                                                                                | 1311 |
| Consensus                  | <b>TAAAGAGTGGAATGATTTAGAAACCTTGATGTTGCTGCATATATNGGTTTGACNNGTGG</b>                                                                                                                                                          |      |
| F.n.n. FSC769              | <b>AGATTTTATGTTACGTCAGCCATATAATCCTGAGAATAACCCAGTTCAGTATAAGCTTAT</b>                                                                                                                                                         | 1379 |
| F.n.o. LADL-07-285A        | . . . . . <b>T</b> . . . . . <b>T</b> . . . . . <b>T</b> . . . . . <b>A</b> . . . . . <b>T</b> . . . . . <b>C</b> . . . . .                                                                                                 | 1379 |
| F. philomiragia ATCC 25017 | . . . . . <b>T</b> . . . . . <b>T</b> . . . . . <b>A</b> . . . . . <b>T</b> . . . . . <b>C</b> . . . . .                                                                                                                    | 1379 |
| F. novicida U112           | . . . . . <b>T</b> . . . . . <b>G</b> . . . . . <b>G</b> . . . . . <b>A</b> . . . . . <b>T</b> . . . . . <b>A</b> . . . . .                                                                                                 | 1371 |
| F.t. holarctica LVS        | . . . . . <b>T</b> . . . . . <b>G</b> . . . . . <b>G</b> . . . . . <b>A</b> . . . . . <b>T</b> . . . . . <b>A</b> . . . . .                                                                                                 | 1371 |
| F.t.t. Schu S4             | . . . . . <b>T</b> . . . . . <b>G</b> . . . . . <b>G</b> . . . . . <b>A</b> . . . . . <b>T</b> . . . . . <b>A</b> . . . . .                                                                                                 | 1371 |
| Consensus                  | <b>NGATTTTATGTTNCGNCANCCATATAATCCTGAGAATAATCCAGTTCAGTATAANCTTAT</b>                                                                                                                                                         |      |
| F.n.n. FSC769              | <b>GGAAGGCTTTAACGAGTTTGTGGATCATAAGAATAATGATAGCTACTTATGGGGACCCTC</b>                                                                                                                                                         | 1439 |
| F.n.o. LADL-07-285A        | . . . . . <b>T</b> . . . . . <b>A</b> . . . . . <b>T</b> . . . . . <b>T</b> . . . . . <b>G</b> . . . . . <b>G</b> . . . . . <b>T</b> . . . . . <b>T</b> . . . . . <b>G</b> . . . . . <b>C</b> . . . . . <b>T</b> . . . . .  | 1439 |
| F. philomiragia ATCC 25017 | . . . . . <b>C</b> . . . . . <b>T</b> . . . . . <b>A</b> . . . . . <b>T</b> . . . . . <b>T</b> . . . . . <b>G</b> . . . . . <b>G</b> . . . . . <b>T</b> . . . . . <b>T</b> . . . . . <b>G</b> . . . . . <b>T</b> . . . . .  | 1439 |
| F. novicida U112           | . . . . . <b>T</b> . . . . . <b>T</b> . . . . . <b>T</b> . . . . . <b>G</b> . . . . . <b>T</b> . . . . . <b>G</b> . . . . . <b>A</b> . . . . . <b>T</b> . . . . . <b>TC</b> . . . . . <b>TG</b> . . . . .                   | 1431 |
| F.t. holarctica LVS        | . . . . . <b>T</b> . . . . . <b>T</b> . . . . . <b>T</b> . . . . . <b>G</b> . . . . . <b>T</b> . . . . . <b>G</b> . . . . . <b>A</b> . . . . . <b>T</b> . . . . . <b>TC</b> . . . . . <b>TG</b> . . . . .                   | 1431 |
| F.t.t. Schu S4             | . . . . . <b>T</b> . . . . . <b>T</b> . . . . . <b>T</b> . . . . . <b>G</b> . . . . . <b>T</b> . . . . . <b>G</b> . . . . . <b>A</b> . . . . . <b>T</b> . . . . . <b>TC</b> . . . . . <b>TG</b> . . . . .                   | 1431 |
| Consensus                  | <b>GGAAGGCTTTAATGAGTTTGTGGATGATAAGAATAATGATAGCTACTTATGGGGACCTNC</b>                                                                                                                                                         |      |

1 460 1 480 1 500

F.n.n. FSC769 **ATCTATTCAAGTTAGTTAAAAATATGGTGAGATCATATGATAAAAAC TAGATGGTTTCAATA** 1499

F.n.o. LADL-07-285A ..... C ..... A ..... G ..... 1499

F. philomiragia ATCC 25017 ..... A ..... G ..... 1499

F. novicida U112 **T . A . . . . . TC . . . . . G . . . . . A . . . . . T . . . . . C . . . . .** 1491

F.t. holarctica LVS **T . A . . . . . TC . . . . . G . . . . . A . . . . . T . . . . . C . . . . .** 1491

F.t.t. Schu S4 **T . A . . . . . TC . . . . . G . . . . . A . . . . . T . . . . . C . . . . .** 1491

Consensus **NTCNATTCANCTAGTTAANAATATGATGAGATCTTATGATAAAAAC TAGATGGTTNCAATA**

1 520 1 540 1 560

F.n.n. FSC769 **CATAAGAGGTGTTGAAAGTGGTGGTTATGTAAGAACTTAGTGTCATGTGTTTATGATAA** 1559

F.n.o. LADL-07-285A ..... A ..... G ..... T ..... C ..... A ..... 1559

F. philomiragia ATCC 25017 **T . . . . . A . . . . . G . . . . . T . . . . . A . . . . . G . . . . . A . . . . . G . . . . .** 1559

F. novicida U112 **T . . . . . A . . . . . G . . . . . A . . . . . G . . . . . AG . . . . . T . . . . . C . . . . . A . . . . .** 1551

F.t. holarctica LVS **T . . . . . A . . . . . G . . . . . AG . . . . . G . . . . . AG . . . . . T . . . . . C . . . . . A . . . . .** 1551

F.t.t. Schu S4 **T . . . . . A . . . . . G . . . . . AG . . . . . G . . . . . AG . . . . . T . . . . . C . . . . . A . . . . .** 1551

Consensus **TATAAGAGGNGTTGANAGTGGTGGTTATGTAANAACCTTNGTANCTTGNGTNTATGATAA**

1 580 1 600 1 620

F.n.n. FSC769 **TAAAGGTGCTTAGAAACAAAGCCGCCACTGAATGCTTTATTTGCAGATTATATGGAGCT** 1619

F.n.o. LADL-07-285A ..... T ..... T ..... 1619

F. philomiragia ATCC 25017 ..... T ..... A ..... T ..... 1619

F. novicida U112 **..... CA . TC . . . . . T . . . . . T . A . . . . . T . A . . . . . TA . . . . . T . . . . . T . . . . .** 1611

F.t. holarctica LVS **..... CA . TC . . . . . T . . . . . T . A . . . . . TT . A . . . . . TA . . . . . T . . . . . T . . . . .** 1611

F.t.t. Schu S4 **..... CA . TC . . . . . T . . . . . T . A . . . . . TT . A . . . . . TA . . . . . C . . . . . T . . . . . T . . . . .** 1611

Consensus **TAAAGNNTNNTAGAAACNAAGTCNCCNCTAAATGTNTTATTTGCNGATTATATGGAGNT**

1 640 1 660 1 680

F.n.n. FSC769 **ATCACTTCAAATATTGGTTTAAATACCATTGTGAAGTGA AAAAGGTACAAGTAATGCTTG** 1679

F.n.o. LADL-07-285A ..... G ..... G ..... 1679

F. philomiragia ATCC 25017 ..... G ..... C ..... 1679

F. novicida U112 ..... G ..... T ..... C ..... 1671

F.t. holarctica LVS ..... G ..... T ..... 1671

F.t.t. Schu S4 ..... G ..... T ..... C ..... 1671

Consensus **ATCACTTGCAAATATTGGTTTAAATACCATTGTGAAGTGA AAAAGGTACNAGTAATGCTTG**

1 700 1 720 1 740

F.n.n. FSC769 **TTTTTTTAGTGTGAAGCTCAGCTAAGAAAGTTGAAGAGTTTGTAGATAGTTTTGATTCTGC** 1739

F.n.o. LADL-07-285A ..... C ..... C ..... A ..... 1739

F. philomiragia ATCC 25017 ..... C ..... A ..... 1739

F. novicida U112 **..... C . . . . . A . . . . . T . . . . . T . . . . . A . . . . . C . . . . . A . . . . . G . . . . . A . . . . . C . . . . . A . . . . .** 1731

F.t. holarctica LVS **..... C . . . . . A . . . . . T . . . . . T . . . . . A . . . . . C . . . . . A . . . . . G . . . . . A . . . . . C . . . . . A . . . . .** 1731

F.t.t. Schu S4 **..... C . . . . . A . . . . . T . . . . . T . . . . . A . . . . . C . . . . . A . . . . . G . . . . . A . . . . . C . . . . . A . . . . .** 1731

Consensus **TTTCTTTAGTGTNAANTCNGCTAANAAGTCGAAGANTTTGTAGATNGNTTTGANTCNGC**

1 760 1 780 1 800

F.n.n. FSC769 **TAATTCAATGTTGATTGCTAATCTTTCTTATACTATGTGTATATCCAGAATTTACATTA** 1799

F.n.o. LADL-07-285A ..... C ..... C . A ..... 1799

F. philomiragia ATCC 25017 ..... C ..... A ..... 1799

F. novicida U112 **A . C . . . . . GA . A . . . . . C . . . . . C . . . . . G . . . . . A . . . . . T . . . . .** 1791

F.t. holarctica LVS **A . C . . . . . GA . A . . . . . C . . . . . C . . . . . G . . . . . A . . . . . T . . . . .** 1791

F.t.t. Schu S4 **A . C . . . . . GA . A . . . . . C . . . . . C . . . . . G . . . . . A . . . . . T . . . . .** 1791

Consensus **NAACTCAANNTTAATGTCTAANCTTTCTTANACTATGTGTATATCNAGAAATNTCNCATTA**

1 820 1 840 1 860

F.n.n. FSC769 **TATTAAGTGTGTTATCAGAGATAAGATAGGAAGTGTGTTAGGTGCTGAGCAAATTCAAAA** 1859

F.n.o. LADL-07-285A ..... A ..... A ..... T ..... C ..... 1859

F. philomiragia ATCC 25017 ..... A ..... A ..... T ..... C ..... 1859

F. novicida U112 **..... A . . . . . A . . . . . T . . . . . T . . . . . T . . . . . A . . . . . G . . . . . A . . . . . TC . . . . . TCG . . . . .** 1851

F.t. holarctica LVS **..... A . . . . . A . . . . . T . . . . . T . . . . . T . . . . . A . . . . . G . . . . . A . . . . . TC . . . . . TCG . . . . .** 1851

F.t.t. Schu S4 **..... A . . . . . A . . . . . T . . . . . T . . . . . T . . . . . A . . . . . G . . . . . A . . . . . TC . . . . . TCG . . . . .** 1851

Consensus **TATTAANTGTGTNATNAGAGATAAGATNGGNAGTNTTGTGGNTGNNAGNNTTCAAAA**

1 880 1 900 1 920

F.n.n. FSC769 **TATTTCTTTCAGATTGGATATCAGAGTTTGTACTACTGTATATCAACCAACGCCCTTTAGA** 1919

F.n.o. LADL-07-285A ..... G ..... A . C ..... 1919

F. philomiragia ATCC 25017 ..... C ..... C ..... 1919

F. novicida U112 **A . . . . . T . . . . . A . . . . . C . . . . . C . . . . . A . . . . . C . . . . .** 1911

F.t. holarctica LVS **A . . . . . T . . . . . A . . . . . C . . . . . C . . . . . A . . . . . C . . . . .** 1911

F.t.t. Schu S4 **A . . . . . T . . . . . A . . . . . C . . . . . C . . . . . A . . . . . C . . . . .** 1911

Consensus **NATTTCTTTCAGATTGGATATCAGANTTTGTNACNACAGTNTATCAACCAACCCCTTTAGA**

|                            |  |                                                                                                                 |  |       |  |       |      |
|----------------------------|--|-----------------------------------------------------------------------------------------------------------------|--|-------|--|-------|------|
|                            |  | 1 940                                                                                                           |  | 1 960 |  | 1 980 |      |
| F.n.n. FSC769              |  | <b>GATGGCAAGATATCCTTTTAGGAATGTTTCTATTGATGTTAAACCTATACCGGGTAAACC</b>                                             |  |       |  |       | 1979 |
| F.n.o. LADL-07-285A        |  | . . . . . G . . . . . C . . . . . T . . . . . T . . . . . A . . . . .                                           |  |       |  |       | 1979 |
| F. philomiragia ATCC 25017 |  | . . . . . G . . . . . C . . . . . T . . . . . T . . . . . A . . . . .                                           |  |       |  |       | 1979 |
| F. novicida U112           |  | A . . . . . G . . . . . C . A . C . . . . . C . G . . . . . C . . . . . G . . . . .                             |  |       |  |       | 1971 |
| F.t. holarctica LVS        |  | A . . . . . G . . . . . C . A . C . . . . . C . G . . . . . C . . . . . G . . . . .                             |  |       |  |       | 1971 |
| F.t.t. Schu S4             |  | A . . . . . G . . . . . C . A . C . . . . . C . G . . . . . C . . . . . G . . . . .                             |  |       |  |       | 1971 |
| Consensus                  |  | <b>NATGGCGAGATATCCTTTNAGNAANGTTTCTATNGANGTTAAACNATACCGGGTAANCC</b>                                              |  |       |  |       |      |
|                            |  | 2 000                                                                                                           |  | 2 020 |  | 2 040 |      |
| F.n.n. FSC769              |  | <b>AGGGTGGTATTCATGTAAAAATAATGTGATTCCACATTCAATTTGAAGGTATGGATAC</b>                                               |  |       |  |       | 2039 |
| F.n.o. LADL-07-285A        |  | . . . . . C . . . . . C . . . . . . . . . . . . . . . . . . . . . G . . . . .                                   |  |       |  |       | 2039 |
| F. philomiragia ATCC 25017 |  | . . . . . C . . . . . . . . . . . . . . . . . . . . . . . . . . . . . . . . .                                   |  |       |  |       | 2039 |
| F. novicida U112           |  | T . . . . . C . . . . . C . . . . . A . . . . . C . . . . . A . . . . . A . . . . .                             |  |       |  |       | 2031 |
| F.t. holarctica LVS        |  | T . . . . . C . . . . . C . . . . . A . . . . . C . . . . . A . . . . . A . . . . .                             |  |       |  |       | 2031 |
| F.t.t. Schu S4             |  | T . . . . . C . . . . . C . . . . . A . . . . . C . . . . . A . . . . . A . . . . .                             |  |       |  |       | 2031 |
| Consensus                  |  | <b>NGGNTGGTATTCATGCAAAATAATGTNATTCNCACATTCAATTTGAAGGNATGNATAC</b>                                               |  |       |  |       |      |
|                            |  | 2 060                                                                                                           |  | 2 080 |  | 2 100 |      |
| F.n.n. FSC769              |  | <b>TACAATGACTATTGATACTAGGTTAGAACCAGAATTATTTGGCGCGAATAATAACTAAAA</b>                                             |  |       |  |       | 2099 |
| F.n.o. LADL-07-285A        |  | . . . . . . . . . . . . . . . . . . . . . . . . . . . . . . . . . . . . . . .                                   |  |       |  |       | 2099 |
| F. philomiragia ATCC 25017 |  | . . . . . . . . . . . . . . . . . . . . . . . . . . . . . . . . . . . . . . .                                   |  |       |  |       | 2099 |
| F. novicida U112           |  | . . . . . A . . . . . C . T . . . . . . . . . . . C . T A . A . . . . . . . . . .                               |  |       |  |       | 2091 |
| F.t. holarctica LVS        |  | . . . . . A . . . . . C . T . . . . . . . . . . . C . T A . A . . . . . . . . . .                               |  |       |  |       | 2091 |
| F.t.t. Schu S4             |  | . . . . . A . . . . . C . T . . . . . . . . . . . C . T A . A . . . . . . . . . .                               |  |       |  |       | 2091 |
| Consensus                  |  | <b>TACAATGACTATNGATACTAGGNTNGAACCAGAATTATTCGGTNCNAATAATAACTAAAA</b>                                             |  |       |  |       |      |
|                            |  | 2 120                                                                                                           |  | 2 140 |  | 2 160 |      |
| F.n.n. FSC769              |  | <b>ACAAGGAGAATGATTATGAACGAGATGATAACAAGACAGCAAGTTACAAGTGGTGAATTT</b>                                             |  |       |  |       | 2159 |
| F.n.o. LADL-07-285A        |  | . . . . . . . . . . . . . . . . . . . . . . . . . . . . . . . . . . . . . . .                                   |  |       |  |       | 2159 |
| F. philomiragia ATCC 25017 |  | . . . . . . . . . . . . . . . . . . . . . . . . . . . . . . . . . . . . . . .                                   |  |       |  |       | 2159 |
| F. novicida U112           |  | . . . . . . . . . . . . . . . . . . . . . . . . . . . . . . . . . . . . . . .                                   |  |       |  |       | 2150 |
| F.t. holarctica LVS        |  | . . . . . . . . . . . . . . . . . . . . . . . . . . . . . . . . . . . . . . .                                   |  |       |  |       | 2150 |
| F.t.t. Schu S4             |  | . . . . . . . . . . . . . . . . . . . . . . . . . . . . . . . . . . . . . . .                                   |  |       |  |       | 2150 |
| Consensus                  |  | <b>ACAAGGAGAATGATTATGAGTGAGATGATAACAAGACANANGTAACAAGTGGCGANACN</b>                                              |  |       |  |       |      |
|                            |  | 2 180                                                                                                           |  | 2 200 |  | 2 220 |      |
| F.n.n. FSC769              |  | <b>ATTTATGTTGGACTGATCCTACAGCGTGATAGGATCTCATCCAATCGTAGATTATTT</b>                                                |  |       |  |       | 2219 |
| F.n.o. LADL-07-285A        |  | . . . . . A . . . . . A . . . . . . . . . . . A . . . . . . . . . . . C . . . . .                               |  |       |  |       | 2219 |
| F. philomiragia ATCC 25017 |  | . . . . . C . . . . . A . . . . . . . . . . . A . . . . . . . . . . . . . . . . . . . . .                       |  |       |  |       | 2219 |
| F. novicida U112           |  | . . . . . C . . . . . GA . A . . . . . T . A . . . . . . . . . . . T . . . . . T . . . . .                      |  |       |  |       | 2210 |
| F.t. holarctica LVS        |  | . . . . . C . . . . . GA . A . . . . . T . A . . . . . . . . . . . T . . . . . T . . . . .                      |  |       |  |       | 2210 |
| F.t.t. Schu S4             |  | . . . . . C . . . . . GA . A . . . . . T . A . . . . . . . . . . . T . . . . . T . . . . .                      |  |       |  |       | 2210 |
| Consensus                  |  | <b>ATTCATGTNAGNACTGATCCTACNGCATGTATAGGATCTCATCCNAATNGTAGATTATTT</b>                                             |  |       |  |       |      |
|                            |  | 2 240                                                                                                           |  | 2 260 |  | 2 280 |      |
| F.n.n. FSC769              |  | <b>ATAGACTCATTACTATGGCAGGAATTGATCTTGATAAGAATATTGTTGCTATAGAAGGC</b>                                              |  |       |  |       | 2279 |
| F.n.o. LADL-07-285A        |  | G . . . . . G . . . . . . . . . . . A . G . . . . . G . . . . . A . . . . . . . . . . . A . . . . .             |  |       |  |       | 2279 |
| F. philomiragia ATCC 25017 |  | . . . . . . . . . . . . . . . . . . . . . . . . . . . . . . . . . . . . . . .                                   |  |       |  |       | 2279 |
| F. novicida U112           |  | . . . . . T . . . . . T . . . . . A . . . . . A . T . GGAGA . A . . . . . A . . . . . C . . . . . G . . . . . T |  |       |  |       | 2270 |
| F.t. holarctica LVS        |  | . . . . . T . . . . . T . . . . . A . . . . . A . T . GGAGA . A . . . . . A . . . . . C . . . . . G . . . . . T |  |       |  |       | 2270 |
| F.t.t. Schu S4             |  | . . . . . T . . . . . T . . . . . A . . . . . A . T . GGAGA . A . . . . . A . . . . . C . . . . . T . . . . .   |  |       |  |       | 2270 |
| Consensus                  |  | <b>ATNGANTCTTTNACTATAGCNGGNGNNAANCTTGATAAAAATATNGTTGCTATAGAAGGT</b>                                             |  |       |  |       |      |
|                            |  | 2 300                                                                                                           |  | 2 320 |  | 2 340 |      |
| F.n.n. FSC769              |  | <b>GGAGAGGATGTTACAAAAGCAGATTCTGCAACTGCTGCAGCCAGTGTATACGCCATCT</b>                                               |  |       |  |       | 2339 |
| F.n.o. LADL-07-285A        |  | . . . . . . . . . . . . . . . . . . . . . . . . . . . . . . . . . . . . . . .                                   |  |       |  |       | 2339 |
| F. philomiragia ATCC 25017 |  | . . . . . . . . . . . . . . . . . . . . . . . . . . . . . . . . . . . . . . .                                   |  |       |  |       | 2339 |
| F. novicida U112           |  | . . . . . . . . . . . C . G . . . . . T . . . . . G . T . A . . . . . T . . . . . A . . . . . TT . . . . .      |  |       |  |       | 2330 |
| F.t. holarctica LVS        |  | . . . . . . . . . . . C . G . . . . . T . . . . . G . T . A . . . . . T . . . . . A . . . . . TT . . . . .      |  |       |  |       | 2330 |
| F.t.t. Schu S4             |  | . . . . . . . . . . . C . G . . . . . T . . . . . G . T . A . . . . . T . . . . . A . . . . . TT . . . . .      |  |       |  |       | 2330 |
| Consensus                  |  | <b>GGAGAGGATGTNACNAAAGCTGATTTCNGCTACAGCTGCTGCTAGTGTAAATACGTTTATCT</b>                                           |  |       |  |       |      |
|                            |  | 2 360                                                                                                           |  | 2 380 |  | 2 400 |      |
| F.n.n. FSC769              |  | <b>ATAACTCCAGGCTCTATAAATCCAACAATAAGTATTACACTTGGAGCTTTGATTAATCA</b>                                              |  |       |  |       | 2399 |
| F.n.o. LADL-07-285A        |  | . . . . . . . . . . . T . . . . . . . . . . . . . . . . . . . . . . . . . . .                                   |  |       |  |       | 2399 |
| F. philomiragia ATCC 25017 |  | . . . . . . . . . . . . . . . . . . . . . . . . . . . . . . . . . . . . . . .                                   |  |       |  |       | 2399 |
| F. novicida U112           |  | . . . . . G . . . . . . . . . . . . . . . . . . . . . T . . . . . T . T . C . A . . . . .                       |  |       |  |       | 2390 |
| F.t. holarctica LVS        |  | . . . . . G . . . . . . . . . . . . . . . . . . . . . T . . . . . T . T . C . A . . . . .                       |  |       |  |       | 2390 |
| F.t.t. Schu S4             |  | . . . . . G . . . . . . . . . . . . . . . . . . . . . T . . . . . T . T . C . A . . . . .                       |  |       |  |       | 2390 |
| Consensus                  |  | <b>ATAACNCCAGGCTCTATAAATCCAACAATAAGTATTACNCTTGGNGNTNTAATTAATCA</b>                                              |  |       |  |       |      |

F.n.n. FSC769 AATACTAGGACTCTACTTGAAGTGTGTATCAAGTATATTACAAGCAGGGGCAACTGAT 2459  
 F.n.o. LADL-07-285A G.GT...CT.G...G.A...T.T.A...G.T...A... 2459  
 F. philomiragia ATCC 25017 ...G...G...G...G... 2459  
 F. novicida U112 GTC.A...AA.A...GAGAAA.T.G.C...A.T.T.A... 2450  
 F.t. holarctica LVS ...GT...A...AA.A...GAGAAA.T.G...A.T.T.A... 2450  
 F.t.t. Schu S4 ...GT...A...AA.A...GAGAAA.T.G...A.T.T.A... 2450  
 Consensus AATGTTAGNACTANANTTGAAGNGNNNGTTTCGAGTATATTACAAGCANGTGCNACAGAT

F.n.n. FSC769 ATGAAAATAAAATTTGGGTAACCTCGAACAAAAACAAGAGTACAAAACAGATGATGCTTGG 2519  
 F.n.o. LADL-07-285A ...T.GC.T.G...T.T...G...T...T...A... 2519  
 F. philomiragia ATCC 25017 ...T...T...T...T... 2519  
 F. novicida U112 ...T.G.A...T.T.T...T...T...A.A... 2510  
 F.t. holarctica LVS ...T.G.A...T.T.T...T...T...A.A... 2510  
 F.t.t. Schu S4 ...T.G.A...T.T.T...T...T...A.A... 2510  
 Consensus ATGAAAATTAAGTTAGGTAANTCTAATAAAAAACAAGAGTANAAAACAGATGAAGCNTGG

F.n.n. FSC769 GGCATTATGATTGATATATCTAATTTAGAATTATATCCTATTAGTGCAGAAGCATTTAGT 2579  
 F.n.o. LADL-07-285A ...T.C...C.G...C.T.T.C... 2579  
 F. philomiragia ATCC 25017 ...T...T...T...T... 2579  
 F. novicida U112 ...T...A.C...G...A.A...TA.G.T... 2570  
 F.t. holarctica LVS ...T...A.C...G...A.A...TA.G.T... 2570  
 F.t.t. Schu S4 ...T...A.C...G...A.A...TA.G.T... 2570  
 Consensus GGTATTATGATNGATNNTACTAATTTAGAGTTATATCCNATAAGTGCNAGGCNNTTAGT

F.n.n. FSC769 ATAAAAATAGAACCAACTGAACCTTATGGGGTTGCGAAAGATGGTATGAGATATCATGTA 2639  
 F.n.o. LADL-07-285A ...A.G...C.AT.T.G...A... 2639  
 F. philomiragia ATCC 25017 ...T.GT...G.A...T.T.A...A...T...A.T... 2639  
 F. novicida U112 ...T.GT...G.A...T.T.A...A...T...A.T... 2639  
 F.t. holarctica LVS ...T.GT...G.A...T.T.A...A...T...A.T... 2639  
 F.t.t. Schu S4 ...T.GT...G.A...T.T.A...A...T...A.T... 2639  
 Consensus ATNANNATAGANCCAACAGAACCTTATGGGTGTTTCAAAGATGGNATGAGATATCATATN

F.n.n. FSC769 GTATCTATTGATGGACTTACAACCTCACAAGGTAGCTTGCCGTGTATGCTGTGCTGCAAGT 2699  
 F.n.o. LADL-07-285A A...G.C...T...T... 2699  
 F. philomiragia ATCC 25017 A...C...G... 2699  
 F. novicida U112 A...A...T...A...A...T...C...A...T...C... 2690  
 F.t. holarctica LVS A...A...T...A...A...T...C...A...T...C... 2690  
 F.t.t. Schu S4 A...A...T...A...A...T...C...A...T...C... 2690  
 Consensus ATATCTATNGATGGCTTACAACNTCNCAAGGNAGCTTGCCNGTATGNTGNGCNGCNAGN

F.n.n. FSC769 ACTGATAAAGGAGTTGCTAGAATAGGGTACATAGCAGCTGTATAGTAA-ATAGGAGTTAT 2758  
 F.n.o. LADL-07-285A ...A...T.C...A... 2758  
 F. philomiragia ATCC 25017 ...A...C...G... 2758  
 F. novicida U112 ...A...A...A...T...T...C...G...C...G... 2749  
 F.t. holarctica LVS ...A...A...A...T...T...C...G...C...G... 2749  
 F.t.t. Schu S4 ...A...A...A...T...T...C...G...C...G... 2749  
 Consensus ACNGATAAAGGAGTTGCTAAAATAGGNTANATNGCAGCTGCATAGTAAGATNGGAGTTNT

F.n.n. FSC769 ATTATTAAAATGTTTCTCGAAAGGATATGTTGGGAAGATGGTCTAAGATTAGACAAGGT 2818  
 F.n.o. LADL-07-285A ...A...A... 2818  
 F. philomiragia ATCC 25017 ...A...G...A... 2818  
 F. novicida U112 ...CT...A...T...A...T...T...GC.A... 2806  
 F.t. holarctica LVS ...CT...A...T...A...T...T...GC.A... 2806  
 F.t.t. Schu S4 ...CT...A...T...A...T...T...GC.A... 2806  
 Consensus ATTATTNNAATGTTTCTNGAAAGGATNTATTGGGAAGATGGTNTAAGATTAGANAGNGAT

F.n.n. FSC769 ATCTTAGACAAATCAAATTTGTCTATTTTAGAAAGGTCAAAGTCTGCAAATTTATTTGCCA 2878  
 F.n.o. LADL-07-285A ...T...TC...G... 2878  
 F. philomiragia ATCC 25017 ...TC...G... 2878  
 F. novicida U112 ...T...T.G...C.A.G...T.GCA.C...GC... 2866  
 F.t. holarctica LVS ...T...T.G...C.A.G...T.GCA.C...GC... 2866  
 F.t.t. Schu S4 ...T...T.G...C.A.G...T.GCA.C...GC... 2866  
 Consensus ATTTTAGATAANTCAAATNTNTCTNTTTAGAAAGGTNAANNNGCAAGNTATTTGCCA

|                            |                                                              |              |              |                     |           |           |      |
|----------------------------|--------------------------------------------------------------|--------------|--------------|---------------------|-----------|-----------|------|
|                            |                                                              | 2 900        |              | 2 920               |           | 2 940     |      |
| F.n.n. FSC769              | GCTAATCTTAATAAAGG                                            | TATCGTTAGTTT | CGATTTAGATAT | GGAGAGTTTGCAGACGGGA |           |           | 2938 |
| F.n.o. LADL-07-285A        | . . . . .                                                    | . . . . .    | . . . . .    | . . . . .           | . . . . . | . . . . . | 2938 |
| F. philomiragia ATCC 25017 | . . . . .                                                    | . . . . .    | . . . . .    | . . . . .           | . . . . . | . . . . . | 2938 |
| F. novicida U112           | . . . . .                                                    | . . . . .    | . . . . .    | . . . . .           | . . . . . | . . . . . | 2926 |
| F.t. holarctica LVS        | . . . . .                                                    | . . . . .    | . . . . .    | . . . . .           | . . . . . | . . . . . | 2926 |
| F.t.t. Schu S4             | . . . . .                                                    | . . . . .    | . . . . .    | . . . . .           | . . . . . | . . . . . | 2926 |
| Consensus                  | GCTAATCTTAATAAANGGNATCGTTAGNNTNGATTAGATNTTGANAGTTTGCAGACAGGN |              |              |                     |           |           |      |
|                            |                                                              | 2 960        |              | 2 980               |           | 3 000     |      |
| F.n.n. FSC769              | CTTATTCTAATAAAGATCTTGTATTGTACTTAGATGAAAAACATTTATTTTTTATGAT   |              |              |                     |           |           | 2998 |
| F.n.o. LADL-07-285A        | . . . . .                                                    | . . . . .    | . . . . .    | . . . . .           | . . . . . | . . . . . | 2998 |
| F. philomiragia ATCC 25017 | . . . . .                                                    | . . . . .    | . . . . .    | . . . . .           | . . . . . | . . . . . | 2998 |
| F. novicida U112           | . . . . .                                                    | . . . . .    | . . . . .    | . . . . .           | . . . . . | . . . . . | 2986 |
| F.t. holarctica LVS        | . . . . .                                                    | . . . . .    | . . . . .    | . . . . .           | . . . . . | . . . . . | 2986 |
| F.t.t. Schu S4             | . . . . .                                                    | . . . . .    | . . . . .    | . . . . .           | . . . . . | . . . . . | 2986 |
| Consensus                  | CTTATNCTNATAAAGAATCTTANATTGTACTTAGATGAAAAANNNTTNTTTTTTATGAT  |              |              |                     |           |           |      |
|                            |                                                              | 3 020        |              | 3 040               |           | 3 060     |      |
| F.n.n. FSC769              | AAATGCTATCCTCTGTCTTTGCAGGTAATGACAGATGAGTTAACTAATGATATCCCTCTA |              |              |                     |           |           | 3058 |
| F.n.o. LADL-07-285A        | . . . . .                                                    | . . . . .    | . . . . .    | . . . . .           | . . . . . | . . . . . | 3058 |
| F. philomiragia ATCC 25017 | . . . . .                                                    | . . . . .    | . . . . .    | . . . . .           | . . . . . | . . . . . | 3058 |
| F. novicida U112           | . . . . .                                                    | . . . . .    | . . . . .    | . . . . .           | . . . . . | . . . . . | 3046 |
| F.t. holarctica LVS        | . . . . .                                                    | . . . . .    | . . . . .    | . . . . .           | . . . . . | . . . . . | 3046 |
| F.t.t. Schu S4             | . . . . .                                                    | . . . . .    | . . . . .    | . . . . .           | . . . . . | . . . . . | 3046 |
| Consensus                  | AANTNNTATCCNNTATCTTNCANATAATGACNGATNAGTTAANTNATGANATCCNNTA   |              |              |                     |           |           |      |
|                            |                                                              | 3 080        |              | 3 100               |           | 3 120     |      |
| F.n.n. FSC769              | TTCTTGAATGTTAAGGAGAAGATAGTTGAAAAAGAGGTGTTAAGTACATATATAATCAA  |              |              |                     |           |           | 3118 |
| F.n.o. LADL-07-285A        | . . . . .                                                    | . . . . .    | . . . . .    | . . . . .           | . . . . . | . . . . . | 3118 |
| F. philomiragia ATCC 25017 | . . . . .                                                    | . . . . .    | . . . . .    | . . . . .           | . . . . . | . . . . . | 3118 |
| F. novicida U112           | . . . . .                                                    | . . . . .    | . . . . .    | . . . . .           | . . . . . | . . . . . | 3106 |
| F.t. holarctica LVS        | . . . . .                                                    | . . . . .    | . . . . .    | . . . . .           | . . . . . | . . . . . | 3106 |
| F.t.t. Schu S4             | . . . . .                                                    | . . . . .    | . . . . .    | . . . . .           | . . . . . | . . . . . | 3106 |
| Consensus                  | TTNNTGAATNTNANAGAGAANNANTTGAAAAANANGNGTTAANTANATNTATAATCAA   |              |              |                     |           |           |      |
|                            |                                                              | 3 140        |              | 3 160               |           | 3 180     |      |
| F.n.n. FSC769              | CTATCACTTTCATTAGAGTATGATTATAGTGTTAAGTATAGTACGCAAATTCATTATTT  |              |              |                     |           |           | 3178 |
| F.n.o. LADL-07-285A        | . . . . .                                                    | . . . . .    | . . . . .    | . . . . .           | . . . . . | . . . . . | 3178 |
| F. philomiragia ATCC 25017 | . . . . .                                                    | . . . . .    | . . . . .    | . . . . .           | . . . . . | . . . . . | 3178 |
| F. novicida U112           | . . . . .                                                    | . . . . .    | . . . . .    | . . . . .           | . . . . . | . . . . . | 3166 |
| F.t. holarctica LVS        | . . . . .                                                    | . . . . .    | . . . . .    | . . . . .           | . . . . . | . . . . . | 3166 |
| F.t.t. Schu S4             | . . . . .                                                    | . . . . .    | . . . . .    | . . . . .           | . . . . . | . . . . . | 3166 |
| Consensus                  | NTNTCANTNTCATTAGAGCATNNTATNGTNTTAANNATAGNANNCAAATTCATTATTT   |              |              |                     |           |           |      |
|                            |                                                              | 3 200        |              | 3 220               |           | 3 240     |      |
| F.n.n. FSC769              | AAGTTAGATAGAGGCAAGTTAGTATCAGATACATATGATTTTCCCTTACTAAGCTTTAAT |              |              |                     |           |           | 3238 |
| F.n.o. LADL-07-285A        | . . . . .                                                    | . . . . .    | . . . . .    | . . . . .           | . . . . . | . . . . . | 3238 |
| F. philomiragia ATCC 25017 | . . . . .                                                    | . . . . .    | . . . . .    | . . . . .           | . . . . . | . . . . . | 3238 |
| F. novicida U112           | . . . . .                                                    | . . . . .    | . . . . .    | . . . . .           | . . . . . | . . . . . | 3226 |
| F.t. holarctica LVS        | . . . . .                                                    | . . . . .    | . . . . .    | . . . . .           | . . . . . | . . . . . | 3226 |
| F.t.t. Schu S4             | . . . . .                                                    | . . . . .    | . . . . .    | . . . . .           | . . . . . | . . . . . | 3226 |
| Consensus                  | ANGTTAGATAGAGGNNNTTAGTANCAGANATNTATGANTTCCNNTANTAAGCTTTAAT   |              |              |                     |           |           |      |
|                            |                                                              | 3 260        |              | 3 280               |           | 3 300     |      |
| F.n.n. FSC769              | CACTATTGATGCATGATACCTTTTATAAAGCTCAATAGAAATGGTTTCTGAATTAATCT  |              |              |                     |           |           | 3298 |
| F.n.o. LADL-07-285A        | . . . . .                                                    | . . . . .    | . . . . .    | . . . . .           | . . . . . | . . . . . | 3298 |
| F. philomiragia ATCC 25017 | . . . . .                                                    | . . . . .    | . . . . .    | . . . . .           | . . . . . | . . . . . | 3298 |
| F. novicida U112           | . . . . .                                                    | . . . . .    | . . . . .    | . . . . .           | . . . . . | . . . . . | 3286 |
| F.t. holarctica LVS        | . . . . .                                                    | . . . . .    | . . . . .    | . . . . .           | . . . . . | . . . . . | 3286 |
| F.t.t. Schu S4             | . . . . .                                                    | . . . . .    | . . . . .    | . . . . .           | . . . . . | . . . . . | 3286 |
| Consensus                  | CANTATTANNNGTNGATATTTTTNTAAANCTNAATAGNANTGTTTCTGAANTAAANTCT  |              |              |                     |           |           |      |
|                            |                                                              | 3 320        |              | 3 340               |           | 3 360     |      |
| F.n.n. FSC769              | TTCAATCGTTTTGTTTTCTCAACCTCAAGATCATATGCTGCAATTTACTTGTATTCTTA  |              |              |                     |           |           | 3358 |
| F.n.o. LADL-07-285A        | . . . . .                                                    | . . . . .    | . . . . .    | . . . . .           | . . . . . | . . . . . | 3358 |
| F. philomiragia ATCC 25017 | . . . . .                                                    | . . . . .    | . . . . .    | . . . . .           | . . . . . | . . . . . | 3358 |
| F. novicida U112           | . . . . .                                                    | . . . . .    | . . . . .    | . . . . .           | . . . . . | . . . . . | 3346 |
| F.t. holarctica LVS        | . . . . .                                                    | . . . . .    | . . . . .    | . . . . .           | . . . . . | . . . . . | 3346 |
| F.t.t. Schu S4             | . . . . .                                                    | . . . . .    | . . . . .    | . . . . .           | . . . . . | . . . . . | 3346 |
| Consensus                  | TTNAATCGNTTTTGTTTTNNTCANCTCAAGATCNTATGCNCAATNTTACTTGTATNTTN  |              |              |                     |           |           |      |

3 380 3 400 3 420  
 F.n.n. FSC769 **ATTAATAAATTAGAAAGAGA****CTTAAATTTGCTGAATCTAATAAGTTAAATAGTTCCTT** 3418  
 F.n.o. LADL-07-285A .....G..... 3418  
 F. philomiragia ATCC 25017 ..... 3418  
 F. novicida U112 .....T.G.G.G.....G.GC.....C.G 3406  
 F.t. holarctica LVS .....T.G.G.C.A.....G.GC.....C.G 3406  
 F.t.t. Schu S4 .....T.G.G.C.A.....G.GC.....AC.G 3406  
 Consensus **ATTAATAAATTAGAAAGAGAANTNAANTTTGCTGAATCTAATANGNNAATAGTTCNCCN**

3 440 3 460 3 480  
 F.n.n. FSC769 **AAGCAAATATTTGATCTAATTCATGATATTTATAGTTTAAATCCAGCTTAACTTAGATAAG** 3478  
 F.n.o. LADL-07-285A ..A.....G..... 3478  
 F. philomiragia ATCC 25017 .....A..... 3478  
 F. novicida U112 .....A.....T.....G.....C.C.....T.A.....C.....A 3466  
 F.t. holarctica LVS .....A.....T.....G.....C.C.....T.A.....C.....A 3466  
 F.t.t. Schu S4 .....A.....T.....G.....C.C.....T.A.....C.....A 3466  
 Consensus **AAACAAATATTTGATNTAATTNATGATATTTANAGNTTAATNCAACTTAACTTAGATAAN**

3 500 3 520 3 540  
 F.n.n. FSC769 **GTTGGGGATGTTGATAATTTGAGTTTGATTTTTATAAATCTATAAGGAAGATAAACTTA** 3538  
 F.n.o. LADL-07-285A .....A.....C..... 3538  
 F. philomiragia ATCC 25017 .....A.....G.....TA..... 3538  
 F. novicida U112 .....AA.GC.....GC.....A.....CC.A.GC.T.G.CT.AT.TC 3526  
 F.t. holarctica LVS .....AA.GC.....GC.....A.....CC.A.GC.T.G.CT.AT.TC 3526  
 F.t.t. Schu S4 .....AA.GC.....GC.....A.....CC.A.GC.T.G.CT.AT.TC 3526  
 Consensus **GTTGANGANNTTGATAGNATTGANTTTGATTTNANAANCCTTNACTAANNATAANNTA**

3 560 3 580 3 600  
 F.n.n. FSC769 **TTGGCTGATAGATTATTGACTCTTTGTGAATATAGAAAAATTAATAACTTTATTAATTT** 3598  
 F.n.o. LADL-07-285A ..C..... 3598  
 F. philomiragia ATCC 25017 ..... 3598  
 F. novicida U112 .....C.T.....G.A.....G.....G.....C.G..... 3586  
 F.t. holarctica LVS .....C.T.....A.....G.....G.....C.G..... 3586  
 F.t.t. Schu S4 .....C.T.....G.A.....G.....C.G..... 3586  
 Consensus **NTNGCTGATAGATTATTNACTCTTTGTGANTATAGAAAANATTAATAACTTTATNANATTT**

3 620 3 640 3 660  
 F.n.n. FSC769 **GAACTGCAAGGAAAAAATATTTATGTGAAACTTCCCGAAGAGTTTTTCGTTGCTACT** 3658  
 F.n.o. LADL-07-285A .....A..... 3658  
 F. philomiragia ATCC 25017 ..... 3658  
 F. novicida U112 .....T.....T.....A.....G.T.T.....T..... 3646  
 F.t. holarctica LVS .....T.....T.....A.....G.T.T.....T..... 3646  
 F.t.t. Schu S4 .....T.....T.....A.....G.T.T.....T..... 3646  
 Consensus **GAANTGCANGGAAAAAATATNTATGTGAAANCCTNCCNGAAGAGTTTTTNGTTGCTACT**

3 680 3 700 3 720  
 F.n.n. FSC769 **AGGTATTATCTTTTCATCAAAGAAAGGCAATAGCTCCAGCTAATGTAAATTTGAAAAAT** 3718  
 F.n.o. LADL-07-285A ..A.....A.....T.....C.T..... 3718  
 F. philomiragia ATCC 25017 .....A.....A.....C..... 3718  
 F. novicida U112 .....A.C.....C.T.....G.A.C.....C.....GG 3706  
 F.t. holarctica LVS .....A.C.....C.T.....G.A.C.....C.....GG 3706  
 F.t.t. Schu S4 .....A.C.....C.T.....G.A.C.....C.....GG 3706  
 Consensus **AGATANTATCTTTTCNTTAAAAGNAANGCAACAGCTCCAGCNAATGTAANNTTGAAAAAT**

3 740 3 760 3 780  
 F.n.n. FSC769 **AAAAAAGCTATGAGAATAACAAGTATAAGTAGAAATAAAAACGTTGTAACCTCTCTCTT** 3778  
 F.n.o. LADL-07-285A ..... 3778  
 F. philomiragia ATCC 25017 ..... 3778  
 F. novicida U112 .....G.T.C.....T.T.....G.TA.....T.G..... 3766  
 F.t. holarctica LVS .....G.T.C.....T.T.....G.TA.....G.....G..... 3766  
 F.t.t. Schu S4 .....G.T.C.....T.T.....G.TA.....G.....G..... 3766  
 Consensus **AANAANGCNTNGAGAATNACNAGTATAAGTAGAAATAANAANNTTGTAACTCTNTCTCTT**

3 800 3 820 3 840  
 F.n.n. FSC769 **TCTGGAGTGAAACTCGTTGAAGTTGAGTATTTCTATGATGAATTTTACAACACGGGTTGAT** 3838  
 F.n.o. LADL-07-285A .....C.C..... 3838  
 F. philomiragia ATCC 25017 .....T.....T.....C.C..... 3838  
 F. novicida U112 .....A.....A.....G.....C.....A.G.....T.....TA.AT 3826  
 F.t. holarctica LVS .....A.....A.....G.....C.....A.G.....T.....TA.AT 3826  
 F.t.t. Schu S4 .....A.....A.....G.....C.....A.G.....T.....TA.AT 3826  
 Consensus **TCNGGAGTAAAAC TGTTGANGTTGANTTTCTATGATNAATTTTACAACNNGNNTTGAT**

```

                                  3 860                3 880                3 900
F.n.n. FSC769 AATATTGATGCAATATATGAAATTCAAAAAGGCTCGGAATGGGACTTTATACTTGC GGAT 3898
F.n.o. LADL-07-285A ..... A ..... 3898
F. philomiragia ATCC 25017 ..... A ..... 3898
F. novicida U112 ..... C ..... T T G ..... T ..... T A ..... 3886
F.t. holarctica LVS ..... T T G ..... T ..... T A ..... 3886
F.t.t. Schu S4 ..... C ..... T T G ..... T ..... T A ..... 3886
Consensus AATATTGATGCAATATATGAAATTCAAAAAGGNTCNGANTGGGANTTTATANTNGCGGAT

```

```

                                  3 920                3 940                3 960
F.n.n. FSC769 AGTAGTGCGGTTTTTACAGCCTTTGAAGGTAGTGAAAACTTTGATTTCTTTATAGCATT 3958
F.n.o. LADL-07-285A ..... T ..... A ..... G ..... A ..... 3958
F. philomiragia ATCC 25017 ..... T ..... A ..... G ..... 3958
F. novicida U112 ..... G T ..... G T ..... C ..... 3946
F.t. holarctica LVS ..... G T ..... G T ..... C ..... 3946
F.t.t. Schu S4 ..... G T ..... G T ..... C ..... 3946
Consensus AGTAGTGCGGTTTTTACNGCTTTGAAGGTAGTGANAANTTTGATTTCTTTATAGCN TTT

```

```

F.n.n. FSC769 ACCTAA 3964
F.n.o. LADL-07-285A ..... 3964
F. philomiragia ATCC 25017 ..... 3964
F. novicida U112 T T ..... 3952
F.t. holarctica LVS T T ..... 3952
F.t.t. Schu S4 T T ..... 3952
Consensus NCNTAA

```

**FIG S2**

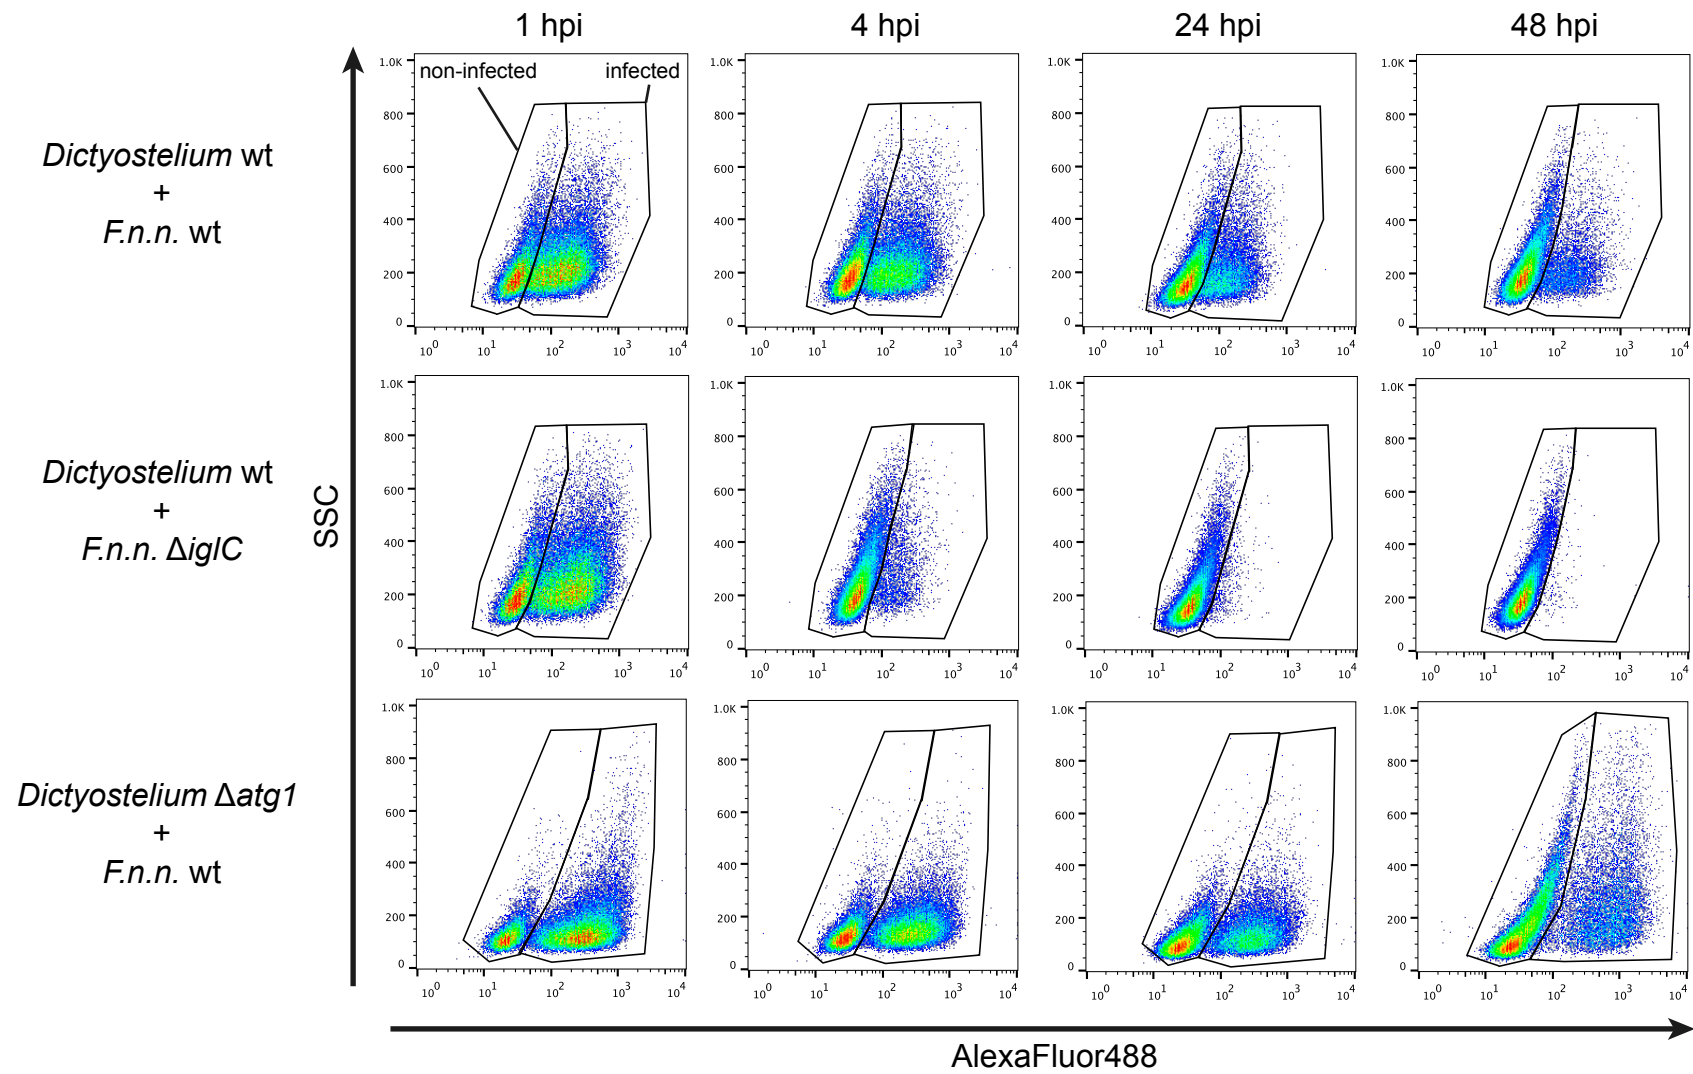



**FIG S3**

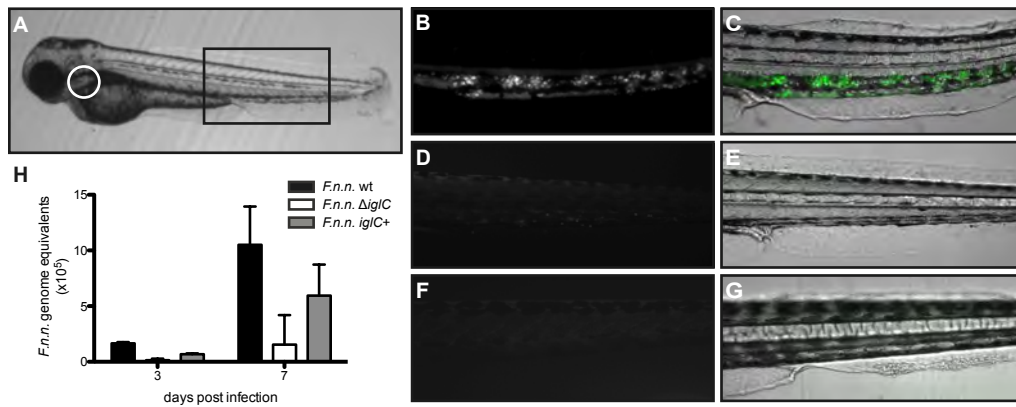

**FIG S4**

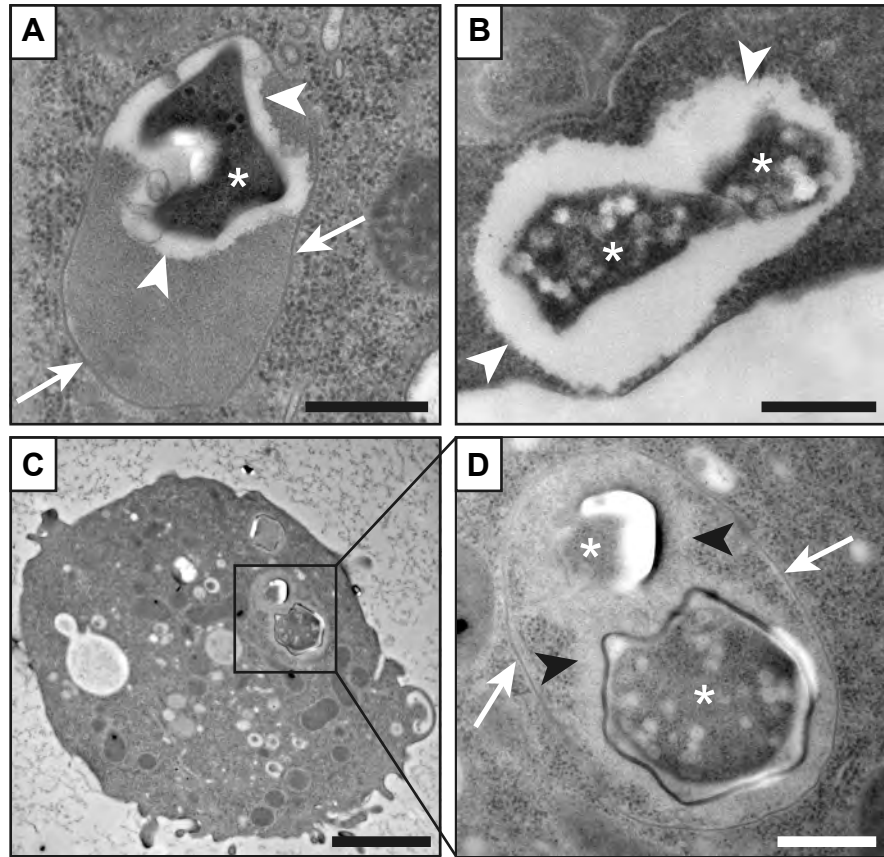

**FIG S5**

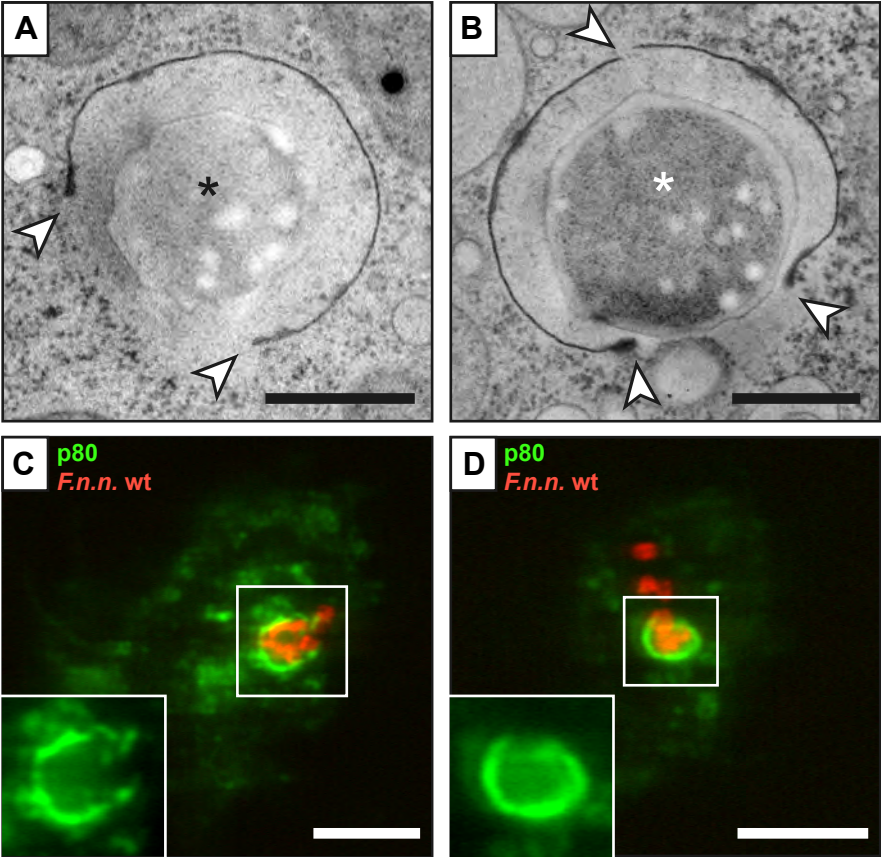

FIG S6

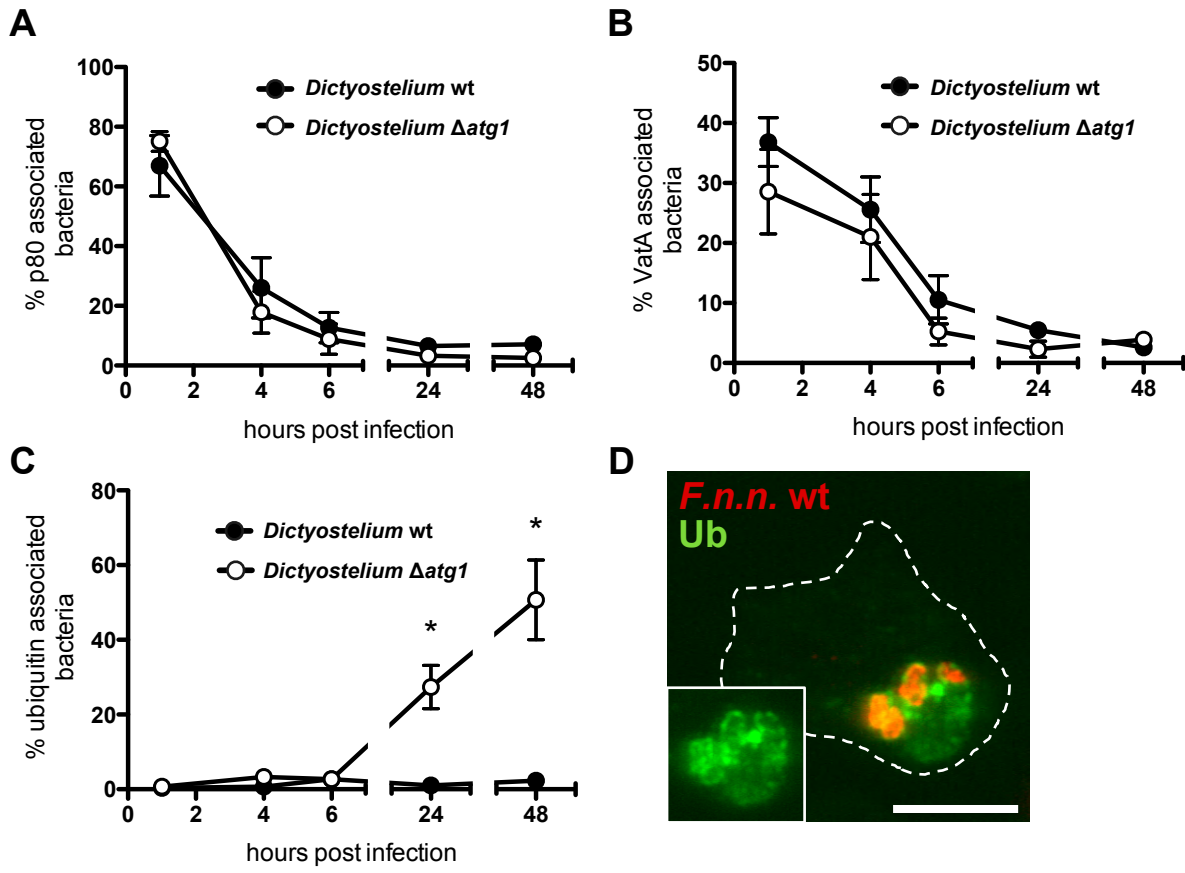

| Primers used for cloning |                            |                                                     |                                                      |                              |
|--------------------------|----------------------------|-----------------------------------------------------|------------------------------------------------------|------------------------------|
|                          | Name                       | 5'-3' sequence                                      | Product size                                         | Source                       |
| P1                       | Fnn_iglC_OF                | GGTGGTGAACCATATGGCGC                                | P1+2: 2271 bp in mutant, 2837 bp in wt <i>F.n.n.</i> | This study                   |
| P2                       | Fnn_iglC_OR                | TAAAGTCCCATTCCGAGCCTT                               |                                                      |                              |
| P3                       | Fnn_iglC_IF                | CACAGCAAGTTGCTAGAATAGGGTACATAGCAGCT                 | P1+4: 1184 bp                                        | This study                   |
| P4                       | Fnn_iglC_IR                | GCTATTCTAGCAACTTGCTGTCTTGTTATCATCTC                 | P2+3: 1105 bp                                        | This study                   |
| P5                       | Fnn_iglC_C1F               | GTGTATGTTGCAGAAATTTGATCA                            | P2+5: 2298 bp in mutant, 2864 bp in wt <i>F.n.n.</i> | This study                   |
| P6                       | Fnn_iglC_C2R               | AACCGCACTACTATCCGCAAG                               | P1+6: 2294 bp in mutant, 2860 bp in wt <i>F.n.n.</i> | This study                   |
| P7                       | Fnn_iglD_IR                | TC AAA GGC TGT TCT TAG ACC ATC TTC CCA ACA          | P5+7: 1228 bp in mutant, 1794 in wt <i>F.n.n.</i>    | This study                   |
| P8                       | Fn_groEL F                 | CATAAGACCAGCGATTGATGC                               | 367 bp                                               | This study                   |
| P9                       | Fn_groEL R                 | AAAAGATCGTGTGGATGATGC                               |                                                      |                              |
| P10                      | Fnn_compl_tr_iglC_F(NdeI)  | TCT GCA CAT ATG ATT ATG AAC GAG ATG ATA ACA AGA CAG | 635 bp                                               | This study                   |
| P11                      | Fnn_compl_tr_iglC_R(EcoRI) | CTGA GAA TTC CTA TAC AGC TGC TAT GTA CCC TAT TCT    |                                                      |                              |
| Primers used for qPCR    |                            |                                                     |                                                      |                              |
|                          | Name                       | 5'-3' sequence                                      | Product size                                         | Source                       |
| Q1                       | Dd_rnlA_F                  | GGCGCTGGTCAAATAGTAAGTATATTAGA                       | 85 bp                                                | (1)                          |
| Q2                       | Dd_rnlA_R                  | GGTTACCGCCCCAGTCAAA                                 |                                                      |                              |
| Q3                       | Dd_gapdh_F                 | GGTTGTCCCAATTGGTATTAATGG                            | 247 bp with gDNA,<br>156 bp with cDNA                | (2)                          |
| Q4                       | Dd_gapdh_R                 | CCGTGGGTTGAATCATATTTGAAC                            |                                                      |                              |
| Q5                       | Dd_atg8_F                  | CTCCAAGATCAGATGCACCA                                | 163 bp                                               | Frauke Bach<br>(GI: 8625555) |
| Q6                       | Dd_atg8_R                  | GCAGCAGTTGGTGGGATAGT                                |                                                      |                              |
| Q7                       | Dd_p62_F                   | TTGAAAATCGCACAACCAAC                                | 172 bp                                               | Frauke Bach<br>(GI: 8617503) |
| Q8                       | Dd_p62_R                   | AGGAACCCTTTGGAATGACA                                |                                                      |                              |
| Q9                       | Fnn_spec_F                 | TGAGTTGGTAACCATTGATTGTACATAGT                       | 97 bp                                                | (3)                          |
| Q10                      | Fnn_spec_R                 | CGAGTACCTGGTGGGAGAAAGA                              |                                                      |                              |
| Q11                      | Fnn_iglB_F                 | GGTGCTGAGCAAATTCAAAA                                | 85 bp                                                | This study<br>(GI:169589433) |
| Q12                      | Fnn_iglB_R                 | CCATCTCTAAAGGCGTTGGT                                |                                                      |                              |
| Q13                      | Fnn_iglC_F                 | TAGGCGTATAACACTGGCTGC                               | 70 bp                                                | (4)                          |
| Q14                      | Fnn_iglC_R                 | TGCTATAGAAGGCGGAGAGG                                |                                                      |                              |
| Q15                      | Fnn_iglD_F                 | TGTGAAAACCTCCCCGAAGA                                | 77 bp                                                | This study<br>(GI:169589431) |
| Q16                      | Fnn_iglD_R                 | GCTGGAGCTATTGCCTTTCT                                |                                                      |                              |

## References

1. **Damer CK, Bayeva M, Kim PS, Ho LK, Eberhardt ES, Socec CI, Lee JS, Bruce EA, Goldman-Yassen AE, Naliboff LC.** 2007. Copine A is required for cytokinesis, contractile vacuole function, and development in Dictyostelium. *Eukaryot Cell* **6**:430-442.
2. **Lucas J, Bilzer A, Moll L, Zundorf I, Dingermann T, Eichinger L, Siol O, Winckler T.** 2009. The carboxy-terminal domain of Dictyostelium C-module-binding factor is an independent gene regulatory entity. *PLoS One* **4**:e5012.
3. **Duodu S, Larsson P, Sjodin A, Soto E, Forsman M, Colquhoun DJ.** 2012. Real-time PCR assays targeting unique DNA sequences of fish-pathogenic *Francisella noatunensis* subspecies *noatunensis* and *orientalis*. *Dis Aquat Organ* **101**:225-234.
4. **Brudal E, Winther-Larsen HC, Colquhoun DJ, Duodu S.** 2013. Evaluation of reference genes for reverse transcription quantitative PCR analyses of fish-pathogenic *Francisella* strains exposed to different growth conditions. *BMC Res Notes* **6**:76.
